# Supplementary material for: Antidepressant Mechanism Research of Acupuncture: Insights from a Genome‐Wide Transcriptome Analysis of Frontal Cortex in Rats with Chronic Restraint Stress
Source: Hindawi journal article supplement (doi:10.1155/2017/1676808), 2017-01-01
Supplement: f1 [file 1676808.f1.pdf]

**Tab.S1a. Differential up regulated genes expression within the frontal cortex by edgeR.**  
 $\log_2FC = \log_2$  fold change. FC = fold change.

| NO. | Ensembl Gene ID    | Gene Symbol    | RPKM (C) | RPKM (M) | P-Value  | Log <sub>2</sub> FC |
|-----|--------------------|----------------|----------|----------|----------|---------------------|
| 1   | ENSRNOG00000019050 | Ifit1          | 28.04    | 3.3      | 2.22E-05 | 3.10E+00            |
| 2   | ENSRNOG00000013330 | Cdhr1          | 5.17     | 1.07     | 1.26E-03 | 2.30E+00            |
| 3   | ENSRNOG00000048486 | LOC680236      | 2.89     | 0.18     | 7.45E-03 | 3.83E+00            |
| 4   | ENSRNOG00000007999 | Abra           | 2.66     | 0.39     | 2.13E-03 | 2.75E+00            |
| 5   | ENSRNOG00000042990 | AABR06076213.1 | 2.17     | 0.38     | 5.62E-03 | 2.49E+00            |
| 6   | ENSRNOG00000000167 | Alas2          | 2.11     | 0.23     | 4.73E-03 | 3.14E+00            |
| 7   | ENSRNOG00000027253 | Pcdhga10       | 2.02     | 0.39     | 3.58E-03 | 2.37E+00            |
| 8   | ENSRNOG00000009434 | RGD1310507     | 1.71     | 0.24     | 6.97E-03 | 2.79E+00            |
| 9   | ENSRNOG00000022808 | LOC100912860   | 1.39     | 0        | 2.00E-03 | 6.81E+00            |
| 10  | ENSRNOG00000042376 | Pcdhgb2        | 1.39     | 0.28     | 8.16E-03 | 2.30E+00            |
| 11  | ENSRNOG00000004712 | Angptl1        | 1.36     | 0        | 5.30E-04 | 7.20E+00            |
| 12  | ENSRNOG00000005655 | Cpa6           | 1.06     | 0.06     | 3.04E-03 | 4.11E+00            |
| 13  | ENSRNOG00000027739 | Cndp1          | 0.92     | 0.09     | 3.12E-03 | 3.19E+00            |
| 14  | ENSRNOG00000012235 | Ppp1r17        | 0.92     | 0.1      | 9.77E-03 | 3.20E+00            |
| 15  | ENSRNOG00000020603 | Angptl6        | 0.87     | 0        | 1.41E-03 | 6.92E+00            |
| 16  | ENSRNOG00000026957 | Ms4a15         | 0.79     | 0        | 6.15E-03 | 6.44E+00            |
| 17  | ENSRNOG00000045960 | PCDHA2         | 0.71     | 0.07     | 7.53E-03 | 3.28E+00            |
| 18  | ENSRNOG00000016417 | RGD1565635     | 0.68     | 0        | 2.86E-03 | 6.70E+00            |
| 19  | ENSRNOG00000014498 | Kbtbd12        | 0.49     | 0        | 6.15E-03 | 6.44E+00            |
| 20  | ENSRNOG00000025332 | Cd109          | 0.35     | 0.02     | 5.48E-03 | 3.93E+00            |

**Tab.S1b. Differential up regulated genes expression within the frontal cortex by edgeR.**  
 $\log_2FC = \log_2$  fold change. FC = fold change.

| NO. | Ensembl Gene ID    | Gene Symbol   | RPKM (F) | RPKM (M) | P-Value  | Log <sub>2</sub> FC |
|-----|--------------------|---------------|----------|----------|----------|---------------------|
| 1   | ENSRNOG00000019050 | Ifit1         | 22.37    | 3.3      | 1.97E-04 | 2.71E+00            |
| 2   | ENSRNOG00000029386 | RT1-N2        | 4.44     | 0.78     | 2.47E-03 | 2.44E+00            |
| 3   | ENSRNOG00000020117 | LOC100911841  | 4.1      | 0.73     | 3.22E-03 | 2.43E+00            |
| 4   | ENSRNOG00000009505 | Cd164l2       | 3.4      | 0.32     | 9.77E-03 | 3.18E+00            |
| 5   | ENSRNOG00000011369 | Kcns2         | 2.53     | 0.42     | 3.53E-03 | 2.51E+00            |
| 6   | ENSRNOG00000027115 | Zc2hc1c       | 2.02     | 0.39     | 5.33E-03 | 2.41E+00            |
| 7   | ENSRNOG00000003171 | Mpz           | 1.9      | 0.27     | 4.05E-03 | 2.73E+00            |
| 8   | ENSRNOG00000051360 | Rn50_X_0739.1 | 1.77     | 0        | 1.41E-03 | 6.91E+00            |
| 9   | ENSRNOG00000042376 | Pcdhgb2       | 1.64     | 0.28     | 4.05E-03 | 2.48E+00            |
| 10  | ENSRNOG00000022808 | LOC100912860  | 1.44     | 0        | 2.00E-03 | 6.80E+00            |
| 11  | ENSRNOG00000002824 | Rlim          | 1.21     | 0.18     | 7.92E-03 | 2.63E+00            |
| 12  | ENSRNOG00000010265 | Ada           | 1.04     | 0.06     | 7.45E-03 | 3.82E+00            |
| 13  | ENSRNOG00000021916 | Slc16a12      | 0.68     | 0        | 2.00E-03 | 6.80E+00            |

**Tab.S1c. Differential up regulated genes expression within the frontal cortex by edgeR.**  
 **$\log_2FC = \log_2$  fold change. FC = fold change.**

| NO. | Ensembl Gene ID    | Gene Symbol    | RPKM (A) | RPKM (M) | P-Value  | Log <sub>2</sub> FC |
|-----|--------------------|----------------|----------|----------|----------|---------------------|
| 1   | ENSRNOG00000047746 | LOC100909555   | 1362.66  | 412.28   | 9.40E-03 | 1.75E+00            |
| 2   | ENSRNOG00000035480 | Mir21          | 68       | 8.23     | 3.06E-04 | 3.05E+00            |
| 3   | ENSRNOG00000046640 | AABR06034184.1 | 4.13     | 0.34     | 6.15E-03 | 6.49E+00            |
| 4   | ENSRNOG00000012450 | Dynlrb2        | 3.76     | 0.56     | 7.29E-03 | 2.92E+00            |
| 5   | ENSRNOG00000037091 | AB041806       | 2.73     | 0.22     | 4.17E-03 | 6.62E+00            |
| 6   | ENSRNOG00000042376 | Pcdhgb2        | 2.41     | 0.28     | 3.13E-04 | 3.10E+00            |
| 7   | ENSRNOG00000000167 | Alas2          | 2.04     | 0.23     | 3.83E-03 | 3.10E+00            |
| 8   | ENSRNOG00000014790 | Cryga          | 1.5      | 0        | 6.15E-03 | 6.49E+00            |
| 9   | ENSRNOG00000030212 | AABR06024301.1 | 1.39     | 0.15     | 9.77E-03 | 3.12E+00            |
| 10  | ENSRNOG00000002350 | Eaf2           | 1.37     | 0.15     | 9.77E-03 | 3.12E+00            |
| 11  | ENSRNOG00000010265 | Ada            | 1.14     | 0.06     | 3.04E-03 | 4.04E+00            |
| 12  | ENSRNOG00000008299 | Allc           | 0.91     | 0.06     | 7.45E-03 | 3.78E+00            |
| 13  | ENSRNOG00000004712 | Angptl1        | 0.9      | 0        | 2.86E-03 | 6.73E+00            |
| 14  | ENSRNOG00000021916 | Slc16a12       | 0.85     | 0        | 3.91E-04 | 7.27E+00            |
| 15  | ENSRNOG00000027739 | Cndp1          | 0.83     | 0.09     | 3.83E-03 | 3.10E+00            |
| 16  | ENSRNOG00000038241 | LOC100359752   | 0.45     | 0        | 6.15E-03 | 6.49E+00            |
| 17  | ENSRNOG00000015499 | Serinc4        | 0.35     | 0        | 9.22E-03 | 6.36E+00            |

**Tab.S2a. Differential down regulated genes expression within the frontal cortex by edgeR.**  
**log<sub>2</sub>FC = log<sub>2</sub> fold change. FC = fold change.**

| NO. | Ensembl Gene ID    | Gene Symbol    | RPKM (C) | RPKM (M) | P-Value  | Log <sub>2</sub> FC |
|-----|--------------------|----------------|----------|----------|----------|---------------------|
| 1   | ENSRNOG00000002919 | Gfap           | 121.39   | 439.85   | 6.35E-03 | -1.84E+00           |
| 2   | ENSRNOG00000032882 | AY172581.19    | 29.74    | 118.14   | 9.09E-03 | -2.01E+00           |
| 3   | ENSRNOG00000043098 | Mt2A           | 25.53    | 102.39   | 4.09E-03 | -1.99E+00           |
| 4   | ENSRNOG00000000768 | Ubd            | 1.27     | 68.44    | 5.46E-11 | -5.71E+00           |
| 5   | ENSRNOG00000018735 | Cd74           | 12.79    | 44.01    | 9.65E-03 | -1.77E+00           |
| 6   | ENSRNOG00000016275 | Ttr            | 1.07     | 40.67    | 2.23E-09 | -5.20E+00           |
| 7   | ENSRNOG00000002217 | Plac8          | 1.42     | 22.73    | 1.35E-06 | -3.97E+00           |
| 8   | ENSRNOG00000022298 | Cxcl11         | 3.01     | 17.33    | 6.70E-04 | -2.51E+00           |
| 9   | ENSRNOG00000008144 | Irf1           | 3.8      | 17.21    | 2.12E-03 | -2.16E+00           |
| 10  | ENSRNOG00000011913 | Cp             | 3.92     | 15.19    | 4.93E-03 | -1.94E+00           |
| 11  | ENSRNOG00000046834 | C3             | 2.1      | 14.99    | 7.47E-05 | -2.82E+00           |
| 12  | ENSRNOG00000022242 | Cxcl9          | 0.64     | 12.19    | 9.30E-07 | -4.21E+00           |
| 13  | ENSRNOG00000047606 | Bcl2a1         | 2.42     | 11.81    | 3.30E-03 | -2.25E+00           |
| 14  | ENSRNOG00000011821 | S100a4         | 1.92     | 11.42    | 2.41E-03 | -2.54E+00           |
| 15  | ENSRNOG00000010906 | Ccl5           | 1.11     | 10.83    | 2.33E-04 | -3.33E+00           |
| 16  | ENSRNOG00000011483 | S100a9         | 1.19     | 10.54    | 7.85E-04 | -3.08E+00           |
| 17  | ENSRNOG00000008816 | Gpnmb          | 2.2      | 9.91     | 2.60E-03 | -2.15E+00           |
| 18  | ENSRNOG00000017869 | Irf8           | 1.77     | 8.7      | 2.56E-03 | -2.27E+00           |
| 19  | ENSRNOG00000018706 | Il15ra         | 1.18     | 7.46     | 1.65E-03 | -2.62E+00           |
| 20  | ENSRNOG00000048220 | Clec12a        | 0.33     | 6.39     | 1.71E-05 | -4.17E+00           |
| 21  | ENSRNOG00000021724 | Ptprcap        | 0.56     | 6.19     | 2.91E-04 | -3.41E+00           |
| 22  | ENSRNOG00000011557 | S100a8         | 0.53     | 6.07     | 2.23E-03 | -3.44E+00           |
| 23  | ENSRNOG00000010645 | Lgals3         | 0.61     | 5.91     | 1.64E-04 | -3.23E+00           |
| 24  | ENSRNOG00000012779 | Msr1           | 0.66     | 5.69     | 2.14E-04 | -3.07E+00           |
| 25  | ENSRNOG00000019141 | Ch25h          | 0.5      | 5.57     | 8.71E-05 | -3.65E+00           |
| 26  | ENSRNOG00000013973 | Len2           | 0.6      | 5.17     | 8.83E-04 | -3.03E+00           |
| 27  | ENSRNOG00000024382 | Fcgr3a         | 0.86     | 4.77     | 2.19E-03 | -2.56E+00           |
| 28  | ENSRNOG00000010527 | Serpina3n      | 0        | 4.65     | 1.25E-11 | -1.04E+01           |
| 29  | ENSRNOG00000030021 | Ccl6           | 0.41     | 4.31     | 2.33E-04 | -3.33E+00           |
| 30  | ENSRNOG00000032708 | LOC688090      | 0.65     | 4.17     | 1.25E-03 | -2.70E+00           |
| 31  | ENSRNOG00000007159 | Ccl2           | 0.24     | 3.95     | 2.31E-04 | -3.94E+00           |
| 32  | ENSRNOG00000013886 | Fyb            | 0.86     | 3.93     | 3.48E-03 | -2.21E+00           |
| 33  | ENSRNOG00000023473 | Rnf122         | 0        | 3.76     | 4.17E-03 | -6.62E+00           |
| 34  | ENSRNOG00000003486 | Mnda           | 0.53     | 3.66     | 1.17E-03 | -2.75E+00           |
| 35  | ENSRNOG00000018820 | Plac8l1        | 0.35     | 3.54     | 4.55E-03 | -3.20E+00           |
| 36  | ENSRNOG00000048076 | AABR06089930.1 | 0        | 3.54     | 6.15E-03 | -6.51E+00           |
| 37  | ENSRNOG00000006940 | Ncf4           | 0.5      | 3.51     | 1.64E-03 | -2.75E+00           |
| 38  | ENSRNOG00000008369 | Gimap4         | 0.59     | 3.17     | 5.55E-03 | -2.38E+00           |
| 39  | ENSRNOG00000033256 | LOC691141      | 0.36     | 3.01     | 4.59E-04 | -3.30E+00           |
| 40  | ENSRNOG00000012280 | Ptx3           | 0.1      | 2.86     | 3.95E-06 | -4.77E+00           |
| 41  | ENSRNOG00000007350 | Rac2           | 0.49     | 2.82     | 4.64E-03 | -2.66E+00           |

|    |                     |                |      |      |          |           |
|----|---------------------|----------------|------|------|----------|-----------|
| 42 | ENSRNOG00000006946  | Arhgap9        | 0.41 | 2.43 | 2.25E-03 | -2.51E+00 |
| 43 | ENSRNOG00000002711  | Nuf2           | 0.37 | 2.43 | 2.79E-03 | -2.68E+00 |
| 44 | ENSRNOG000000020465 | Ripk3          | 0.28 | 2.42 | 8.83E-04 | -3.03E+00 |
| 45 | ENSRNOG00000000239  | Ccl7           | 0    | 2.27 | 2.18E-04 | -7.38E+00 |
| 46 | ENSRNOG000000043416 | Bcl3           | 0.16 | 2.24 | 1.33E-04 | -3.76E+00 |
| 47 | ENSRNOG000000050210 | RT1-CE10       | 0.26 | 2.23 | 3.12E-03 | -3.03E+00 |
| 48 | ENSRNOG000000047248 | AABR06034751.1 | 0.11 | 2.21 | 4.17E-03 | -6.62E+00 |
| 49 | ENSRNOG000000017980 | Irgal          | 0.52 | 2.21 | 5.10E-03 | -2.13E+00 |
| 50 | ENSRNOG000000002802 | Cxcl1          | 0    | 2.16 | 1.65E-04 | -7.44E+00 |
| 51 | ENSRNOG000000000187 | Csf2rb         | 0.18 | 2.12 | 8.70E-05 | -3.65E+00 |
| 52 | ENSRNOG000000015821 | Cd2            | 0.25 | 2.05 | 3.83E-03 | -2.98E+00 |
| 53 | ENSRNOG000000015851 | Nat8b          | 0.12 | 2.01 | 3.04E-03 | -3.91E+00 |
| 54 | ENSRNOG000000026518 | Tmem156        | 0.13 | 2    | 2.78E-04 | -3.90E+00 |
| 55 | ENSRNOG000000021907 | Parvg          | 0.25 | 1.97 | 6.99E-04 | -3.11E+00 |
| 56 | ENSRNOG000000008091 | Gins1          | 0.18 | 1.95 | 2.81E-03 | -3.32E+00 |
| 57 | ENSRNOG000000009342 | Fcnb           | 0.08 | 1.83 | 4.88E-04 | -4.36E+00 |
| 58 | ENSRNOG000000028259 | Mcemp1         | 0.16 | 1.81 | 2.23E-03 | -3.38E+00 |
| 59 | ENSRNOG000000001527 | Cd80           | 0.18 | 1.79 | 4.55E-03 | -3.20E+00 |
| 60 | ENSRNOG000000032404 | Top2a          | 0.19 | 1.66 | 1.84E-04 | -3.10E+00 |
| 61 | ENSRNOG000000015945 | Cd3g           | 0    | 1.61 | 9.22E-03 | -6.38E+00 |
| 62 | ENSRNOG000000004500 | Myc            | 0.24 | 1.6  | 4.05E-03 | -2.69E+00 |
| 63 | ENSRNOG000000011250 | Inmt           | 0.09 | 1.57 | 3.04E-03 | -3.91E+00 |
| 64 | ENSRNOG000000000562 | Prf1           | 0.24 | 1.54 | 4.75E-03 | -2.59E+00 |
| 65 | ENSRNOG000000039204 | Pram1          | 0.09 | 1.51 | 6.91E-05 | -4.83E+00 |
| 66 | ENSRNOG000000016164 | Fcrl2          | 0.09 | 1.46 | 2.31E-04 | -3.94E+00 |
| 67 | ENSRNOG000000026235 | Hk3            | 0.16 | 1.46 | 3.82E-04 | -3.19E+00 |
| 68 | ENSRNOG000000017749 | Nkg7           | 0    | 1.46 | 2.86E-03 | -6.73E+00 |
| 69 | ENSRNOG000000004649 | Il1b           | 0.14 | 1.44 | 3.57E-03 | -3.26E+00 |
| 70 | ENSRNOG000000028137 | Mki67          | 0.29 | 1.4  | 2.25E-03 | -2.25E+00 |
| 71 | ENSRNOG000000009211 | C3ar1          | 0.06 | 1.34 | 7.97E-04 | -4.24E+00 |
| 72 | ENSRNOG000000046878 | Shcbp1         | 0    | 1.33 | 2.25E-05 | -7.91E+00 |
| 73 | ENSRNOG000000005220 | Syne2          | 0.14 | 1.29 | 5.84E-03 | -3.13E+00 |
| 74 | ENSRNOG000000009919 | Irg1           | 0    | 1.28 | 2.25E-05 | -7.91E+00 |
| 75 | ENSRNOG000000006066 | Tfec           | 0.06 | 1.28 | 6.22E-04 | -4.30E+00 |
| 76 | ENSRNOG000000006320 | Ptges          | 0.07 | 1.26 | 3.04E-03 | -3.91E+00 |
| 77 | ENSRNOG000000039447 | Pate4          | 0    | 1.25 | 2.00E-03 | -6.83E+00 |
| 78 | ENSRNOG000000012843 | Aspg           | 0.19 | 1.25 | 3.42E-03 | -2.67E+00 |
| 79 | ENSRNOG000000012678 | Ccnb2          | 0.08 | 1.23 | 7.45E-03 | -3.66E+00 |
| 80 | ENSRNOG000000009334 | Knstrn         | 0    | 1.2  | 3.91E-04 | -7.24E+00 |
| 81 | ENSRNOG000000010603 | Gzma           | 0    | 1.18 | 9.22E-03 | -6.38E+00 |
| 82 | ENSRNOG000000001975 | Ugt2a3         | 0.14 | 1.17 | 9.77E-03 | -2.99E+00 |
| 83 | ENSRNOG000000020281 | Kif22          | 0.14 | 1.16 | 9.77E-03 | -2.99E+00 |
| 84 | ENSRNOG000000000632 | Cdk1           | 0    | 1.12 | 1.41E-03 | -6.92E+00 |
| 85 | ENSRNOG000000006578 | Odf1           | 0.03 | 1.07 | 6.15E-03 | -6.51E+00 |

|     |                    |          |      |      |          |           |
|-----|--------------------|----------|------|------|----------|-----------|
| 86  | ENSRNOG00000002776 | Sell     | 0.06 | 1.06 | 3.04E-03 | -3.91E+00 |
| 87  | ENSRNOG00000017897 | Adam8    | 0.04 | 1.02 | 2.44E-04 | -4.56E+00 |
| 88  | ENSRNOG00000022335 | Rad2111  | 0.11 | 0.99 | 9.77E-03 | -2.99E+00 |
| 89  | ENSRNOG00000010797 | Esm1     | 0    | 0.92 | 2.18E-04 | -7.38E+00 |
| 90  | ENSRNOG00000027096 | Ctsw     | 0    | 0.92 | 4.17E-03 | -6.62E+00 |
| 91  | ENSRNOG00000025728 | Adam32   | 0.08 | 0.91 | 2.23E-03 | -3.44E+00 |
| 92  | ENSRNOG00000020332 | Tnnt3    | 0    | 0.9  | 6.15E-03 | -6.51E+00 |
| 93  | ENSRNOG00000009311 | Fstl3    | 0.1  | 0.84 | 9.77E-03 | -2.99E+00 |
| 94  | ENSRNOG00000005871 | Il1rn    | 0    | 0.83 | 7.27E-04 | -7.09E+00 |
| 95  | ENSRNOG00000021370 | Ccdc69   | 0    | 0.81 | 2.86E-03 | -6.73E+00 |
| 96  | ENSRNOG00000004498 | Scin     | 0.04 | 0.7  | 4.07E-03 | -3.83E+00 |
| 97  | ENSRNOG00000020579 | Col7a1   | 0.1  | 0.68 | 1.25E-03 | -2.70E+00 |
| 98  | ENSRNOG00000024172 | T2       | 0    | 0.68 | 9.22E-03 | -6.38E+00 |
| 99  | ENSRNOG00000016377 | Cep55    | 0    | 0.65 | 5.30E-04 | -7.17E+00 |
| 100 | ENSRNOG00000016148 | Gtse1    | 0.07 | 0.65 | 5.84E-03 | -3.13E+00 |
| 101 | ENSRNOG00000014532 | Lbp      | 0.08 | 0.65 | 9.77E-03 | -2.99E+00 |
| 102 | ENSRNOG00000013294 | Sh2d2a   | 0    | 0.64 | 6.15E-03 | -6.51E+00 |
| 103 | ENSRNOG00000008048 | Plscr1   | 0    | 0.62 | 6.15E-03 | -6.51E+00 |
| 104 | ENSRNOG00000005132 | Slc52a3  | 0    | 0.59 | 2.00E-03 | -6.83E+00 |
| 105 | ENSRNOG00000004029 | Pvrl4    | 0.06 | 0.59 | 5.84E-03 | -3.13E+00 |
| 106 | ENSRNOG00000028250 | Lax1     | 0    | 0.57 | 2.00E-03 | -6.83E+00 |
| 107 | ENSRNOG00000014979 | Themis   | 0    | 0.57 | 6.15E-03 | -6.51E+00 |
| 108 | ENSRNOG00000028896 | A2m      | 0.08 | 0.56 | 4.77E-03 | -2.73E+00 |
| 109 | ENSRNOG00000015873 | Spns3    | 0    | 0.55 | 6.15E-03 | -6.51E+00 |
| 110 | ENSRNOG00000004311 | Gpr182   | 0    | 0.53 | 6.15E-03 | -6.51E+00 |
| 111 | ENSRNOG00000001195 | Trpv4    | 0    | 0.49 | 5.30E-04 | -7.17E+00 |
| 112 | ENSRNOG00000050703 | Fam115c  | 0    | 0.36 | 6.15E-03 | -6.51E+00 |
| 113 | ENSRNOG00000003991 | Ankar    | 0    | 0.27 | 2.86E-03 | -6.73E+00 |
| 114 | ENSRNOG00000005780 | Adamts13 | 0.02 | 0.21 | 9.22E-03 | -6.38E+00 |

**Tab.S2b. Differential down regulated genes expression within the frontal cortex by edgeR.**  
 $\log_2FC = \log_2$  fold change. FC = fold change.

| NO. | Ensembl Gene ID    | Gene Symbol    | RPKM (F) | RPKM (M) | P-Value  | Log <sub>2</sub> FC |
|-----|--------------------|----------------|----------|----------|----------|---------------------|
| 1   | ENSRNOG00000000768 | Ubd            | 17.43    | 68.44    | 3.63E-03 | -2.02E+00           |
| 2   | ENSRNOG00000016275 | Trt            | 0        | 40.67    | 3.71E-14 | -1.13E+01           |
| 3   | ENSRNOG00000048513 | AABR06067067.1 | 6.15     | 23.29    | 7.76E-03 | -2.01E+00           |
| 4   | ENSRNOG00000033045 | H2afj          | 3.68     | 14.75    | 8.82E-03 | -2.04E+00           |
| 5   | ENSRNOG00000022242 | Cxcl9          | 2.17     | 12.19    | 7.42E-04 | -2.54E+00           |
| 6   | ENSRNOG00000011226 | Timm8a1        | 0.93     | 5.47     | 9.77E-03 | -3.00E+00           |
| 7   | ENSRNOG00000010527 | Serpina3n      | 0.53     | 4.65     | 4.01E-05 | -3.18E+00           |
| 8   | ENSRNOG00000048076 | AABR06089930.1 | 0.25     | 3.54     | 6.15E-03 | -6.52E+00           |
| 9   | ENSRNOG00000019134 | Htr4           | 0.65     | 3.09     | 9.81E-03 | -2.25E+00           |
| 10  | ENSRNOG00000004273 | Ifitm1         | 0        | 2.15     | 2.86E-03 | -6.74E+00           |

|    |                    |               |      |      |          |           |
|----|--------------------|---------------|------|------|----------|-----------|
| 11 | ENSRNOG00000009256 | Gkn2          | 0.14 | 1.98 | 5.48E-03 | -3.76E+00 |
| 12 | ENSRNOG00000011205 | Ccl3          | 0.13 | 1.87 | 5.48E-03 | -3.76E+00 |
| 13 | ENSRNOG00000001527 | Cd80          | 0    | 1.79 | 2.18E-04 | -7.38E+00 |
| 14 | ENSRNOG00000037298 | RGD1309036    | 0.26 | 1.64 | 9.11E-03 | -2.71E+00 |
| 15 | ENSRNOG00000007579 | Hsf5          | 0.2  | 1.58 | 3.83E-03 | -3.00E+00 |
| 16 | ENSRNOG00000009227 | Aplnr         | 0    | 1.53 | 1.26E-04 | -7.51E+00 |
| 17 | ENSRNOG00000016945 | Pla2g2a       | 0    | 1.31 | 6.15E-03 | -6.52E+00 |
| 18 | ENSRNOG00000009919 | Irg1          | 0.14 | 1.28 | 1.72E-03 | -3.19E+00 |
| 19 | ENSRNOG00000006066 | Tfec          | 0.18 | 1.28 | 5.86E-03 | -2.83E+00 |
| 20 | ENSRNOG00000051306 | Rn50_1_2682.1 | 0    | 1.25 | 9.22E-03 | -6.26E+00 |
| 21 | ENSRNOG00000030466 | LOC100912642  | 0    | 1.1  | 1.01E-03 | -7.01E+00 |
| 22 | ENSRNOG00000032951 | Jsrp1         | 0    | 1.08 | 2.00E-03 | -6.83E+00 |
| 23 | ENSRNOG00000006578 | Odf1          | 0    | 1.07 | 6.15E-03 | -6.52E+00 |
| 24 | ENSRNOG00000015366 | Neur13        | 0    | 0.99 | 1.41E-03 | -6.93E+00 |
| 25 | ENSRNOG00000049005 | LOC100125368  | 0.12 | 0.95 | 9.77E-03 | -3.00E+00 |
| 26 | ENSRNOG00000005871 | Il1rn         | 0    | 0.83 | 7.27E-04 | -7.09E+00 |
| 27 | ENSRNOG00000024000 | Cd22          | 0.13 | 0.75 | 6.66E-03 | -2.52E+00 |
| 28 | ENSRNOG00000022094 | Lacc1         | 0    | 0.62 | 9.22E-03 | -6.26E+00 |
| 29 | ENSRNOG00000015667 | Epcam         | 0    | 0.62 | 9.22E-03 | -6.26E+00 |
| 30 | ENSRNOG00000037838 | RGD1560455    | 0    | 0.58 | 9.22E-03 | -6.26E+00 |
| 31 | ENSRNOG00000001195 | Trpv4         | 0.06 | 0.49 | 9.77E-03 | -3.00E+00 |
| 32 | ENSRNOG00000018113 | Anln1         | 0.03 | 0.43 | 2.00E-03 | -6.83E+00 |
| 33 | ENSRNOG00000004341 | LOC498222     | 0    | 0.29 | 9.22E-03 | -6.26E+00 |

**Tab.S2c. Differential down regulated genes expression within the frontal cortex by edgeR.**  
 $\log_2FC = \log_2$  fold change. FC = fold change.

| NO. | Ensembl Gene ID    | Gene Symbol | RPKM (A) | RPKM (M) | P-Value  | Log <sub>2</sub> FC |
|-----|--------------------|-------------|----------|----------|----------|---------------------|
| 1   | ENSRNOG00000031743 | Gbp2        | 22.23    | 99       | 1.79E-03 | -2.13E+00           |
| 2   | ENSRNOG00000000768 | Ubd         | 12.46    | 68.44    | 5.24E-04 | -2.44E+00           |
| 3   | ENSRNOG00000016275 | Tr          | 1.92     | 40.67    | 5.46E-08 | -4.37E+00           |
| 4   | ENSRNOG00000023546 | Hspb1       | 8.88     | 32.34    | 8.23E-03 | -1.84E+00           |
| 5   | ENSRNOG00000032240 | Gbp5        | 6.99     | 25.63    | 6.70E-03 | -1.86E+00           |
| 6   | ENSRNOG00000002217 | Plac8       | 1.96     | 22.73    | 7.57E-06 | -3.51E+00           |
| 7   | ENSRNOG00000046834 | C3          | 1.84     | 14.99    | 2.74E-05 | -3.00E+00           |
| 8   | ENSRNOG00000048673 | Slfn3       | 2.76     | 12.21    | 2.07E-03 | -2.12E+00           |
| 9   | ENSRNOG00000022242 | Cxcl9       | 1.87     | 12.19    | 3.40E-04 | -2.68E+00           |
| 10  | ENSRNOG00000022256 | Cxcl10      | 2.84     | 12.06    | 4.40E-03 | -2.05E+00           |
| 11  | ENSRNOG00000047606 | Bcl2a1      | 3.01     | 11.81    | 9.52E-03 | -1.93E+00           |
| 12  | ENSRNOG00000011821 | S100a4      | 2.58     | 11.42    | 7.51E-03 | -2.12E+00           |
| 13  | ENSRNOG00000032844 | RT1-Da      | 2.89     | 10.79    | 7.96E-03 | -1.91E+00           |
| 14  | ENSRNOG00000002470 | Ifi47       | 1.91     | 8.94     | 2.28E-03 | -2.22E+00           |
| 15  | ENSRNOG00000018706 | Il15ra      | 0.95     | 7.46     | 2.83E-04 | -3.10E+00           |
| 16  | ENSRNOG00000033697 | Casp4       | 1.45     | 7.07     | 2.91E-03 | -2.27E+00           |

|    |                    |                |      |      |          |           |
|----|--------------------|----------------|------|------|----------|-----------|
| 17 | ENSRNOG00000033667 | Lmbr11         | 1.31 | 6.98 | 2.27E-03 | -2.38E+00 |
| 18 | ENSRNOG00000021724 | Ptprcap        | 1.11 | 6.19 | 2.94E-03 | -2.45E+00 |
| 19 | ENSRNOG00000010645 | Lgals3         | 0.55 | 5.91 | 6.58E-05 | -3.39E+00 |
| 20 | ENSRNOG00000010527 | Serpina3n      | 0.2  | 4.65 | 1.56E-07 | -4.48E+00 |
| 21 | ENSRNOG00000033444 | F10            | 0.7  | 4.25 | 8.68E-04 | -2.69E+00 |
| 22 | ENSRNOG00000006314 | Zbp1           | 0.99 | 4.2  | 7.30E-03 | -2.05E+00 |
| 23 | ENSRNOG00000007159 | Ccl2           | 0.32 | 3.95 | 4.81E-04 | -3.54E+00 |
| 24 | ENSRNOG00000013745 | Ctrc           | 0.67 | 3.79 | 5.33E-03 | -2.46E+00 |
| 25 | ENSRNOG00000011406 | Ccl4           | 0.4  | 3.7  | 2.55E-03 | -3.14E+00 |
| 26 | ENSRNOG00000013564 | Dok3           | 0.55 | 3.27 | 2.61E-03 | -2.51E+00 |
| 27 | ENSRNOG00000031593 | Nanos3         | 0.46 | 3.27 | 5.76E-03 | -2.74E+00 |
| 28 | ENSRNOG00000033256 | LOC691141      | 0.52 | 3.01 | 4.03E-03 | -2.47E+00 |
| 29 | ENSRNOG00000012280 | Ptx3           | 0.52 | 2.86 | 2.97E-03 | -2.41E+00 |
| 30 | ENSRNOG00000025764 | Mt1            | 0.1  | 2.79 | 2.86E-03 | -6.70E+00 |
| 31 | ENSRNOG00000000528 | Fgd2           | 0.64 | 2.77 | 5.82E-03 | -2.09E+00 |
| 32 | ENSRNOG00000017980 | Igal           | 0.46 | 2.21 | 2.36E-03 | -2.28E+00 |
| 33 | ENSRNOG00000007579 | Hsf5           | 0.19 | 1.58 | 2.55E-03 | -3.14E+00 |
| 34 | ENSRNOG00000039204 | Pram1          | 0.08 | 1.51 | 1.92E-04 | -4.06E+00 |
| 35 | ENSRNOG00000026235 | Hk3            | 0    | 1.46 | 4.00E-07 | -8.72E+00 |
| 36 | ENSRNOG00000048193 | Hnrnp3         | 0.06 | 1.41 | 5.30E-04 | -7.16E+00 |
| 37 | ENSRNOG00000002425 | Pctp           | 0.24 | 1.39 | 9.45E-03 | -2.47E+00 |
| 38 | ENSRNOG00000027811 | Lilrb4         | 0.07 | 1.37 | 3.04E-03 | -3.98E+00 |
| 39 | ENSRNOG00000028273 | Tmem150b       | 0.14 | 1.36 | 1.14E-03 | -3.64E+00 |
| 40 | ENSRNOG00000001704 | Runx1          | 0.13 | 1.29 | 1.42E-03 | -3.28E+00 |
| 41 | ENSRNOG00000009919 | Irg1           | 0.05 | 1.28 | 1.03E-04 | -4.80E+00 |
| 42 | ENSRNOG00000017819 | Cd14           | 0.06 | 1.28 | 7.97E-04 | -4.33E+00 |
| 43 | ENSRNOG00000039447 | Pate4          | 0    | 1.25 | 1.41E-03 | -6.90E+00 |
| 44 | ENSRNOG00000051306 | Rn50_1_2682.1  | 0    | 1.25 | 9.22E-03 | -6.32E+00 |
| 45 | ENSRNOG00000004921 | Nusap1         | 0.21 | 1.2  | 7.46E-03 | -2.45E+00 |
| 46 | ENSRNOG00000029897 | AABR06000165.1 | 0    | 1.12 | 2.00E-03 | -6.80E+00 |
| 47 | ENSRNOG00000006578 | Odf1           | 0    | 1.07 | 4.17E-03 | -6.58E+00 |
| 48 | ENSRNOG00000050984 | AABR06104464.1 | 0    | 1    | 4.17E-03 | -6.58E+00 |
| 49 | ENSRNOG00000027376 | Il17rc         | 0.16 | 0.98 | 6.97E-03 | -2.68E+00 |
| 50 | ENSRNOG00000018058 | Runx3          | 0    | 0.88 | 2.86E-03 | -6.70E+00 |
| 51 | ENSRNOG00000004575 | Il1a           | 0.09 | 0.86 | 7.53E-03 | -3.14E+00 |
| 52 | ENSRNOG00000013940 | RGD1565989     | 0    | 0.8  | 9.22E-03 | -6.32E+00 |
| 53 | ENSRNOG00000024000 | Cd22           | 0.09 | 0.75 | 2.32E-03 | -2.97E+00 |
| 54 | ENSRNOG00000032085 | Dlec1          | 0.03 | 0.63 | 2.29E-03 | -4.06E+00 |
| 55 | ENSRNOG00000022261 | Cenpu          | 0    | 0.62 | 4.17E-03 | -6.58E+00 |
| 56 | ENSRNOG00000040190 | AABR06077184.1 | 0    | 0.6  | 6.15E-03 | -6.46E+00 |
| 57 | ENSRNOG00000038572 | Ncapg          | 0    | 0.59 | 2.91E-04 | -7.31E+00 |
| 58 | ENSRNOG00000001011 | Fam101a        | 0    | 0.57 | 6.15E-03 | -6.46E+00 |
| 59 | ENSRNOG00000028896 | A2m            | 0.05 | 0.56 | 1.42E-03 | -3.28E+00 |
| 60 | ENSRNOG00000049123 | AABR06058376.1 | 0    | 0.55 | 4.17E-03 | -6.58E+00 |

|    |                    |                |      |      |          |           |
|----|--------------------|----------------|------|------|----------|-----------|
| 61 | ENSRNOG00000042259 | Slc22a14       | 0    | 0.53 | 4.17E-03 | -6.58E+00 |
| 62 | ENSRNOG00000012892 | Abca4          | 0.09 | 0.52 | 4.57E-03 | -2.44E+00 |
| 63 | ENSRNOG00000001007 | Baiap211       | 0    | 0.51 | 2.00E-03 | -6.80E+00 |
| 64 | ENSRNOG00000003950 | Lvrn           | 0.03 | 0.51 | 3.04E-03 | -3.98E+00 |
| 65 | ENSRNOG00000016041 | Zc3h12d        | 0.02 | 0.5  | 1.03E-03 | -4.27E+00 |
| 66 | ENSRNOG00000005037 | Kif18a         | 0.03 | 0.5  | 3.04E-03 | -3.98E+00 |
| 67 | ENSRNOG00000030759 | Nhs            | 0.07 | 0.5  | 5.76E-03 | -2.74E+00 |
| 68 | ENSRNOG00000001195 | Trpv4          | 0    | 0.49 | 3.91E-04 | -7.24E+00 |
| 69 | ENSRNOG00000043206 | AABR06018817.1 | 0    | 0.47 | 2.86E-03 | -6.70E+00 |
| 70 | ENSRNOG00000030938 | RGD1564074     | 0    | 0.39 | 6.15E-03 | -6.46E+00 |
| 71 | ENSRNOG00000017546 | Mylk3          | 0    | 0.34 | 6.15E-03 | -6.46E+00 |
| 72 | ENSRNOG00000015581 | Dnah6          | 0    | 0.09 | 6.15E-03 | -6.46E+00 |

---



**Tab.S3a. Enriched GO terms in down regulated genes for frontal cortex (C VS. M)**

| NO. | Term                                                 | Input<br>number | Background<br>number | Enrichment<br>Ratio | P-Value  | Corrected<br>P-Value |
|-----|------------------------------------------------------|-----------------|----------------------|---------------------|----------|----------------------|
| 1   | MF: chemokine activity                               | 7               | 37                   | 1.89E-01            | 6.33E-12 | 6.33E-11             |
| 2   | CC: extracellular space                              | 23              | 999                  | 2.30E-02            | 4.14E-11 | 6.21E-10             |
| 3   | BP: cellular response to<br>lipopolysaccharide       | 9               | 114                  | 7.89E-02            | 8.50E-11 | 1.11E-09             |
| 4   | BP: response to lipopolysaccharide                   | 11              | 224                  | 4.91E-02            | 9.68E-11 | 1.11E-09             |
| 5   | BP: immune response                                  | 10              | 225                  | 4.44E-02            | 2.00E-09 | 1.11E-08             |
| 6   | BP: positive regulation of neutrophil<br>chemotaxis  | 5               | 18                   | 2.78E-01            | 2.30E-09 | 1.11E-08             |
| 7   | BP: neutrophil chemotaxis                            | 6               | 39                   | 1.54E-01            | 2.41E-09 | 1.11E-08             |
| 8   | BP: cellular response to<br>interleukin-1            | 6               | 54                   | 1.11E-01            | 1.84E-08 | 7.05E-08             |
| 9   | BP: inflammatory response                            | 8               | 192                  | 4.17E-02            | 1.58E-07 | 5.20E-07             |
| 10  | BP: response to glucocorticoid<br>stimulus           | 7               | 131                  | 5.34E-02            | 1.87E-07 | 5.37E-07             |
| 11  | BP: response to gamma radiation                      | 5               | 43                   | 1.16E-01            | 2.43E-07 | 6.22E-07             |
| 12  | BP: chemotaxis                                       | 5               | 62                   | 8.06E-02            | 1.56E-06 | 3.59E-06             |
| 13  | BP: response to wounding                             | 5               | 66                   | 7.58E-02            | 2.14E-06 | 4.47E-06             |
| 14  | BP: cellular response to tumor<br>necrosis factor    | 5               | 70                   | 7.14E-02            | 2.87E-06 | 5.49E-06             |
| 15  | BP: response to ethanol                              | 6               | 150                  | 4.00E-02            | 8.07E-06 | 1.43E-05             |
| 16  | MF: molecular_function                               | 16              | 1769                 | 9.04E-03            | 8.05E-06 | 4.03E-05             |
| 17  | MF: heparin binding                                  | 5               | 125                  | 4.00E-02            | 2.13E-05 | 7.10E-05             |
| 18  | CC: external side of plasma<br>membrane              | 8               | 238                  | 3.36E-02            | 1.14E-05 | 8.57E-05             |
| 19  | BP: response to organic cyclic<br>compound           | 6               | 240                  | 2.50E-02            | 1.13E-04 | 1.83E-04             |
| 20  | BP: innate immune response                           | 5               | 151                  | 3.31E-02            | 1.19E-04 | 1.83E-04             |
| 21  | BP: positive regulation of apoptotic<br>process      | 6               | 285                  | 2.11E-02            | 2.87E-04 | 4.13E-04             |
| 22  | BP: apoptotic process                                | 6               | 300                  | 2.00E-02            | 3.78E-04 | 5.11E-04             |
| 23  | BP: positive regulation of gene<br>expression        | 5               | 210                  | 2.38E-02            | 5.49E-04 | 7.01E-04             |
| 24  | BP: response to drug                                 | 7               | 474                  | 1.48E-02            | 7.42E-04 | 8.99E-04             |
| 25  | BP: negative regulation of apoptotic<br>process      | 6               | 414                  | 1.45E-02            | 2.01E-03 | 2.31E-03             |
| 26  | CC: cell surface                                     | 8               | 446                  | 1.79E-02            | 8.69E-04 | 4.34E-03             |
| 27  | MF: protein heterodimerization<br>activity           | 6               | 513                  | 1.17E-02            | 2.46E-03 | 6.15E-03             |
| 28  | CC: extracellular vesicular exosome                  | 15              | 1499                 | 1.00E-02            | 2.51E-03 | 9.40E-03             |
| 29  | BP: positive regulation of<br>transcription from RNA | 7               | 792                  | 8.84E-03            | 1.27E-02 | 1.39E-02             |

|    |                                                         |    |      |          |          |          |
|----|---------------------------------------------------------|----|------|----------|----------|----------|
|    | polymerase II promoter                                  |    |      |          |          |          |
| 30 | MF: calcium ion binding                                 | 6  | 668  | 8.98E-03 | 8.83E-03 | 1.77E-02 |
| 31 | BP: positive regulation of transcription, DNA-dependent | 5  | 529  | 9.45E-03 | 2.67E-02 | 2.79E-02 |
| 32 | CC: cellular_component                                  | 14 | 1600 | 8.75E-03 | 1.13E-02 | 3.39E-02 |
| 34 | MF: protein homodimerization activity                   | 5  | 675  | 7.41E-03 | 3.49E-02 | 5.81E-02 |
| 35 | CC: protein complex                                     | 6  | 498  | 1.20E-02 | 2.45E-02 | 6.11E-02 |
| 36 | BP: biological_process                                  | 8  | 1432 | 5.59E-03 | 8.42E-02 | 8.42E-02 |
| 37 | MF: DNA binding                                         | 6  | 1097 | 5.47E-03 | 7.37E-02 | 1.05E-01 |
| 38 | CC: extracellular region                                | 7  | 821  | 8.53E-03 | 7.54E-02 | 1.62E-01 |
| 39 | MF: protein binding                                     | 6  | 1307 | 4.59E-03 | 1.39E-01 | 1.74E-01 |
| 40 | MF: zinc ion binding                                    | 5  | 1110 | 4.50E-03 | 1.79E-01 | 1.99E-01 |
| 41 | CC: cytosol                                             | 8  | 1155 | 6.93E-03 | 1.46E-01 | 2.74E-01 |
| 42 | CC: cytoplasm                                           | 24 | 4417 | 5.43E-03 | 1.70E-01 | 2.84E-01 |
| 43 | CC: nucleus                                             | 26 | 4919 | 5.29E-03 | 1.95E-01 | 2.92E-01 |
| 44 | MF: ATP binding                                         | 5  | 1448 | 3.45E-03 | 3.55E-01 | 3.55E-01 |
| 45 | CC: intracellular                                       | 6  | 1007 | 5.96E-03 | 2.98E-01 | 4.07E-01 |
| 46 | CC: plasma membrane                                     | 16 | 3258 | 4.91E-03 | 3.90E-01 | 4.87E-01 |
| 47 | CC: nucleolus                                           | 7  | 1724 | 4.06E-03 | 6.66E-01 | 7.69E-01 |
| 48 | CC: integral to membrane                                | 19 | 4734 | 4.01E-03 | 7.55E-01 | 8.09E-01 |

**Tab.S3b. Enriched GO terms in down regulated genes for frontal cortex (F VS. M)**

| NO. | Term                     | Input number | Background number | Enrichment Ratio | P-Value  | Corrected P-Value |
|-----|--------------------------|--------------|-------------------|------------------|----------|-------------------|
| 1   | CC: extracellular space  | 5            | 999               | 5.01E-03         | 7.18E-04 | 2.15E-03          |
| 2   | CC: integral to membrane | 6            | 4734              | 1.27E-03         | 1.41E-01 | 2.12E-01          |
| 3   | CC: cytoplasm            | 5            | 4417              | 1.13E-03         | 2.52E-01 | 2.52E-01          |

**Tab.S3c. Enriched GO terms in down regulated genes for frontal cortex (A VS. M)**

| NO. | Term                                        | Input number | Background number | Enrichment Ratio | P-Value  | Corrected P-Value |
|-----|---------------------------------------------|--------------|-------------------|------------------|----------|-------------------|
| 1   | BP: inflammatory response                   | 8            | 192               | 4.17E-02         | 1.02E-11 | 4.06E-11          |
| 2   | BP: cellular response to lipopolysaccharide | 5            | 114               | 4.39E-02         | 1.11E-07 | 2.21E-07          |
| 3   | CC: extracellular space                     | 13           | 999               | 1.30E-02         | 5.12E-07 | 4.09E-06          |
| 4   | BP: response to lipopolysaccharide          | 5            | 224               | 2.23E-02         | 3.16E-06 | 4.21E-06          |
| 5   | BP: biological_process                      | 7            | 1432              | 4.89E-03         | 4.64E-04 | 4.64E-04          |
| 6   | CC: external side of plasma membrane        | 5            | 238               | 2.10E-02         | 2.90E-04 | 1.16E-03          |
| 7   | MF: molecular function                      | 9            | 1769              | 5.09E-03         | 5.06E-04 | 1.23E-03          |

|    |                                         |    |      |          |          |          |
|----|-----------------------------------------|----|------|----------|----------|----------|
| 8  | MF: protein heterodimerization activity | 5  | 513  | 9.75E-03 | 7.17E-04 | 1.23E-03 |
| 9  | MF: identical protein binding           | 5  | 516  | 9.69E-03 | 7.36E-04 | 1.23E-03 |
| 10 | MF: protein binding                     | 7  | 1307 | 5.36E-03 | 1.92E-03 | 2.40E-03 |
| 11 | MF: ATP binding                         | 7  | 1448 | 4.83E-03 | 3.45E-03 | 3.45E-03 |
| 12 | CC: cellular_component                  | 10 | 1600 | 6.25E-03 | 4.83E-03 | 1.29E-02 |
| 13 | CC: extracellular vesicular exosome     | 9  | 1499 | 6.00E-03 | 9.88E-03 | 1.98E-02 |
| 14 | CC: cytosol                             | 7  | 1155 | 6.06E-03 | 2.20E-02 | 3.53E-02 |
| 15 | CC: cytoplasm                           | 17 | 4417 | 3.85E-03 | 2.93E-02 | 3.90E-02 |
| 16 | CC: nucleus                             | 16 | 4919 | 3.25E-03 | 1.30E-01 | 1.49E-01 |
| 17 | CC: plasma membrane                     | 10 | 3258 | 3.07E-03 | 2.76E-01 | 2.76E-01 |

---

**Tab.S4a. Enriched KEGG pathways in up regulated genes for frontal cortex (C VS. M)**

| NO. | Term                                        | Input number | Background number | Enrichment Ratio | P-Value  | Corrected P-Value |
|-----|---------------------------------------------|--------------|-------------------|------------------|----------|-------------------|
| 1   | M: Histidine metabolism                     | 1            | 23                | 4.35E-02         | 1.27E-02 | 4.96E-02          |
| 2   | M: beta-Alanine metabolism                  | 1            | 30                | 3.33E-02         | 1.66E-02 | 4.96E-02          |
| 3   | M: Glycine, serine and threonine metabolism | 1            | 39                | 2.56E-02         | 2.15E-02 | 4.96E-02          |
| 4   | M: Porphyrin and chlorophyll metabolism     | 1            | 40                | 2.50E-02         | 2.20E-02 | 4.96E-02          |
| 5   | M: Arginine and proline metabolism          | 1            | 60                | 1.67E-02         | 3.29E-02 | 5.02E-02          |
| 6   | OS: Long-term depression                    | 1            | 61                | 1.64E-02         | 3.35E-02 | 5.02E-02          |
| 7   | HD: Hepatitis C                             | 1            | 125               | 8.00E-03         | 6.77E-02 | 8.70E-02          |
| 8   | HD: Herpes simplex infection                | 1            | 201               | 4.98E-03         | 1.07E-01 | 1.21E-01          |
| 9   | M: Metabolic pathways                       | 2            | 1228              | 1.63E-03         | 1.37E-01 | 1.37E-01          |

**Tab.S4b. Enriched KEGG pathways in up regulated genes for frontal cortex (F VS. M)**

| NO. | Term                                | Input number | Background number | Enrichment Ratio | P-Value  | Corrected P-Value |
|-----|-------------------------------------|--------------|-------------------|------------------|----------|-------------------|
| 1   | HD: Primary immunodeficiency        | 1            | 35                | 2.86E-02         | 1.45E-02 | 8.71E-02          |
| 2   | HD: Hepatitis C                     | 1            | 125               | 8.00E-03         | 5.12E-02 | 9.77E-02          |
| 3   | EIP: Cell adhesion molecules (CAMs) | 1            | 166               | 6.02E-03         | 6.76E-02 | 9.77E-02          |
| 4   | M: Purine metabolism                | 1            | 171               | 5.85E-03         | 6.96E-02 | 9.77E-02          |
| 5   | HD: Herpes simplex infection        | 1            | 201               | 4.98E-03         | 8.15E-02 | 9.77E-02          |
| 6   | M: Metabolic pathways               | 1            | 1228              | 8.14E-04         | 4.29E-01 | 4.29E-01          |

**Tab.S4c. Enriched KEGG pathways in up regulated genes for frontal cortex (A VS. M)**

| NO. | Term                                        | Input number | Background number | Enrichment Ratio | P-Value  | Corrected P-Value |
|-----|---------------------------------------------|--------------|-------------------|------------------|----------|-------------------|
| 1   | M: Metabolic pathways                       | 4            | 1228              | 3.26E-03         | 8.43E-04 | 6.75E-03          |
| 2   | M: Purine metabolism                        | 2            | 171               | 1.17E-02         | 3.26E-03 | 1.30E-02          |
| 3   | M: Histidine metabolism                     | 1            | 23                | 4.35E-02         | 1.27E-02 | 2.52E-02          |
| 4   | M: beta-Alanine metabolism                  | 1            | 30                | 3.33E-02         | 1.66E-02 | 2.52E-02          |
| 5   | HD: Primary immunodeficiency                | 1            | 35                | 2.86E-02         | 1.93E-02 | 2.52E-02          |
| 6   | M: Glycine, serine and threonine metabolism | 1            | 39                | 2.56E-02         | 2.15E-02 | 2.52E-02          |
| 7   | M: Porphyrin and chlorophyll metabolism     | 1            | 40                | 2.50E-02         | 2.20E-02 | 2.52E-02          |
| 8   | M: Arginine and proline metabolism          | 1            | 60                | 1.67E-02         | 3.29E-02 | 3.29E-02          |

**Tab.S5a. Enriched KEGG pathways in down regulated genes for frontal cortex (C VS. M)**

| NO. | Term                                             | Input number | Background number | Enrichment Ratio | P-Value  | Corrected P-Value |
|-----|--------------------------------------------------|--------------|-------------------|------------------|----------|-------------------|
| 1   | OS: Chemokine signaling pathway                  | 8            | 176               | 4.55E-02         | 1.78E-05 | 1.80E-03          |
| 2   | OS: Toll-like receptor signaling pathway         | 6            | 94                | 6.38E-02         | 3.33E-05 | 1.80E-03          |
| 3   | EIP: Cytokine-cytokine receptor interaction      | 8            | 212               | 3.77E-02         | 6.78E-05 | 1.87E-03          |
| 4   | EIP: TNF signaling pathway                       | 6            | 107               | 5.61E-02         | 6.92E-05 | 1.87E-03          |
| 5   | HD: Rheumatoid arthritis                         | 5            | 83                | 6.02E-02         | 2.09E-04 | 4.52E-03          |
| 6   | HD: Staphylococcus aureus infection              | 4            | 49                | 8.16E-02         | 2.96E-04 | 5.32E-03          |
| 7   | OS: NOD-like receptor signaling pathway          | 4            | 56                | 7.14E-02         | 4.96E-04 | 7.65E-03          |
| 8   | HD: Chagas disease                               | 5            | 104               | 4.81E-02         | 5.97E-04 | 8.06E-03          |
| 9   | HD: Leishmaniasis                                | 4            | 66                | 6.06E-02         | 9.26E-04 | 1.11E-02          |
| 10  | HD: Pertussis                                    | 4            | 72                | 5.56E-02         | 1.28E-03 | 1.39E-02          |
| 11  | HD: Herpes simplex infection                     | 6            | 201               | 2.99E-02         | 2.03E-03 | 1.99E-02          |
| 12  | HD: Viral myocarditis                            | 4            | 86                | 4.65E-02         | 2.48E-03 | 2.23E-02          |
| 13  | OS: Natural killer cell mediated cytotoxicity    | 4            | 96                | 4.17E-02         | 3.69E-03 | 3.06E-02          |
| 14  | HD: Tuberculosis                                 | 5            | 169               | 2.96E-02         | 5.09E-03 | 3.64E-02          |
| 15  | HD: Malaria                                      | 3            | 54                | 5.56E-02         | 5.44E-03 | 3.64E-02          |
| 16  | OS: Cytosolic DNA-sensing pathway                | 3            | 54                | 5.56E-02         | 5.44E-03 | 3.64E-02          |
| 17  | HD: Legionellosis                                | 3            | 55                | 5.45E-02         | 5.72E-03 | 3.64E-02          |
| 18  | HD: Graft-versus-host disease                    | 3            | 64                | 4.69E-02         | 8.72E-03 | 5.23E-02          |
| 19  | OS: Complement and coagulation cascades          | 3            | 71                | 4.23E-02         | 1.16E-02 | 6.58E-02          |
| 20  | HD: Type I diabetes mellitus                     | 3            | 73                | 4.11E-02         | 1.25E-02 | 6.74E-02          |
| 21  | OS: Hematopoietic cell lineage                   | 3            | 80                | 3.75E-02         | 1.60E-02 | 8.10E-02          |
| 22  | HD: Salmonella infection                         | 3            | 81                | 3.70E-02         | 1.65E-02 | 8.10E-02          |
| 23  | EIP: NF-kappa B signaling pathway                | 3            | 86                | 3.49E-02         | 1.93E-02 | 9.08E-02          |
| 24  | HD: Prion diseases                               | 2            | 36                | 5.56E-02         | 2.37E-02 | 1.04E-01          |
| 25  | EIP: Cell adhesion molecules (CAMs)              | 4            | 166               | 2.41E-02         | 2.42E-02 | 1.04E-01          |
| 26  | HD: Systemic lupus erythematosus                 | 3            | 97                | 3.09E-02         | 2.65E-02 | 1.10E-01          |
| 27  | M: Butirosin and neomycin biosynthesis           | 1            | 5                 | 2.00E-01         | 3.29E-02 | 1.27E-01          |
| 28  | OS: Intestinal immune network for IgA production | 2            | 43                | 4.65E-02         | 3.31E-02 | 1.27E-01          |
| 29  | CP: Phagosome                                    | 4            | 185               | 2.16E-02         | 3.41E-02 | 1.27E-01          |
| 30  | OS: Leukocyte transendothelial migration         | 3            | 119               | 2.52E-02         | 4.45E-02 | 1.60E-01          |

|    |                                                      |   |     |          |          |          |
|----|------------------------------------------------------|---|-----|----------|----------|----------|
| 31 | OS: Osteoclast differentiation                       | 3 | 121 | 2.48E-02 | 4.63E-02 | 1.61E-01 |
| 32 | EIP: VEGF signaling pathway                          | 2 | 60  | 3.33E-02 | 6.03E-02 | 2.04E-01 |
| 33 | HD: Colorectal cancer                                | 2 | 63  | 3.17E-02 | 6.58E-02 | 2.13E-01 |
| 34 | EIP: Jak-STAT signaling pathway                      | 3 | 141 | 2.13E-02 | 6.72E-02 | 2.13E-01 |
| 35 | HD: Allograft rejection                              | 2 | 66  | 3.03E-02 | 7.13E-02 | 2.20E-01 |
| 36 | CP: p53 signaling pathway                            | 2 | 67  | 2.99E-02 | 7.32E-02 | 2.20E-01 |
| 37 | HD: Autoimmune thyroid disease                       | 2 | 73  | 2.74E-02 | 8.49E-02 | 2.47E-01 |
| 38 | CP: Adherens junction                                | 2 | 74  | 2.70E-02 | 8.69E-02 | 2.47E-01 |
| 39 | HD: Influenza A                                      | 3 | 163 | 1.84E-02 | 9.42E-02 | 2.61E-01 |
| 40 | CP: Apoptosis                                        | 2 | 81  | 2.47E-02 | 1.01E-01 | 2.68E-01 |
| 41 | M: Primary bile acid biosynthesis                    | 1 | 16  | 6.25E-02 | 1.02E-01 | 2.68E-01 |
| 42 | OS: Fc gamma R-mediated phagocytosis                 | 2 | 86  | 2.33E-02 | 1.12E-01 | 2.85E-01 |
| 43 | M: Selenocompound metabolism                         | 1 | 18  | 5.56E-02 | 1.14E-01 | 2.85E-01 |
| 44 | HD: HTLV-I infection                                 | 4 | 285 | 1.40E-02 | 1.21E-01 | 2.97E-01 |
| 45 | OS: Vitamin digestion and absorption                 | 1 | 24  | 4.17E-02 | 1.49E-01 | 3.57E-01 |
| 46 | EIP: Rap1 signaling pathway                          | 3 | 211 | 1.42E-02 | 1.65E-01 | 3.82E-01 |
| 47 | OS: Inflammatory mediator regulation of TRP channels | 2 | 112 | 1.79E-02 | 1.71E-01 | 3.82E-01 |
| 48 | CP: Regulation of actin cytoskeleton                 | 3 | 216 | 1.39E-02 | 1.74E-01 | 3.82E-01 |
| 49 | HD: Thyroid cancer                                   | 1 | 29  | 3.45E-02 | 1.77E-01 | 3.82E-01 |
| 50 | HD: Viral carcinogenesis                             | 3 | 218 | 1.38E-02 | 1.77E-01 | 3.82E-01 |
| 51 | HD: Epstein-Barr virus infection                     | 3 | 220 | 1.36E-02 | 1.80E-01 | 3.82E-01 |
| 52 | M: Galactose metabolism                              | 1 | 31  | 3.23E-02 | 1.88E-01 | 3.90E-01 |
| 53 | CP: Cell cycle                                       | 2 | 125 | 1.60E-02 | 2.03E-01 | 4.13E-01 |
| 54 | HD: African trypanosomiasis                          | 1 | 35  | 2.86E-02 | 2.09E-01 | 4.16E-01 |
| 55 | HD: Measles                                          | 2 | 130 | 1.54E-02 | 2.15E-01 | 4.16E-01 |
| 56 | HD: Bladder cancer                                   | 1 | 37  | 2.70E-02 | 2.20E-01 | 4.16E-01 |
| 57 | M: Fructose and mannose metabolism                   | 1 | 37  | 2.70E-02 | 2.20E-01 | 4.16E-01 |
| 58 | EIP: Wnt signaling pathway                           | 2 | 138 | 1.45E-02 | 2.34E-01 | 4.26E-01 |
| 59 | M: Porphyrin and chlorophyll metabolism              | 1 | 40  | 2.50E-02 | 2.35E-01 | 4.26E-01 |
| 60 | EIP: MAPK signaling pathway                          | 3 | 253 | 1.19E-02 | 2.37E-01 | 4.26E-01 |
| 61 | OS: Carbohydrate digestion and absorption            | 1 | 41  | 2.44E-02 | 2.40E-01 | 4.26E-01 |
| 62 | M: Tryptophan metabolism                             | 1 | 45  | 2.22E-02 | 2.61E-01 | 4.47E-01 |
| 63 | OS: Mineral absorption                               | 1 | 45  | 2.22E-02 | 2.61E-01 | 4.47E-01 |
| 64 | M: Amino sugar and nucleotide sugar metabolism       | 1 | 47  | 2.13E-02 | 2.71E-01 | 4.57E-01 |
| 65 | HD: Type II diabetes mellitus                        | 1 | 50  | 2.00E-02 | 2.85E-01 | 4.67E-01 |
| 66 | M: Starch and sucrose metabolism                     | 1 | 50  | 2.00E-02 | 2.85E-01 | 4.67E-01 |

|    |                                                                 |   |     |          |          |          |
|----|-----------------------------------------------------------------|---|-----|----------|----------|----------|
| 67 | HD: Transcriptional misregulation<br>in cancer                  | 2 | 162 | 1.23E-02 | 2.94E-01 | 4.68E-01 |
| 68 | HD: Endometrial cancer                                          | 1 | 52  | 1.92E-02 | 2.95E-01 | 4.68E-01 |
| 69 | HD: Acute myeloid leukemia                                      | 1 | 57  | 1.75E-02 | 3.18E-01 | 4.98E-01 |
| 70 | HD: Inflammatory bowel disease<br>(IBD)                         | 1 | 59  | 1.69E-02 | 3.27E-01 | 5.05E-01 |
| 71 | HD: Pancreatic cancer                                           | 1 | 65  | 1.54E-02 | 3.54E-01 | 5.38E-01 |
| 72 | M: Glycolysis / Gluconeogenesis                                 | 1 | 67  | 1.49E-02 | 3.63E-01 | 5.44E-01 |
| 73 | OS: Fc epsilon RI signaling<br>pathway                          | 1 | 69  | 1.45E-02 | 3.71E-01 | 5.48E-01 |
| 74 | OS: B cell receptor signaling<br>pathway                        | 1 | 70  | 1.43E-02 | 3.75E-01 | 5.48E-01 |
| 75 | HD: Chronic myeloid leukemia                                    | 1 | 75  | 1.33E-02 | 3.96E-01 | 5.63E-01 |
| 76 | OS: Prolactin signaling pathway                                 | 1 | 75  | 1.33E-02 | 3.96E-01 | 5.63E-01 |
| 77 | M: Arachidonic acid metabolism                                  | 1 | 77  | 1.30E-02 | 4.04E-01 | 5.67E-01 |
| 78 | EIP: TGF-beta signaling pathway                                 | 1 | 82  | 1.22E-02 | 4.24E-01 | 5.82E-01 |
| 79 | HD: Small cell lung cancer                                      | 1 | 85  | 1.18E-02 | 4.36E-01 | 5.82E-01 |
| 80 | OS: Progesterone-mediated oocyte<br>maturation                  | 1 | 86  | 1.16E-02 | 4.39E-01 | 5.82E-01 |
| 81 | CP: Gap junction                                                | 1 | 87  | 1.15E-02 | 4.43E-01 | 5.82E-01 |
| 82 | OS: Protein digestion and<br>absorption                         | 1 | 87  | 1.15E-02 | 4.43E-01 | 5.82E-01 |
| 83 | EIP: ErbB signaling pathway                                     | 1 | 88  | 1.14E-02 | 4.47E-01 | 5.82E-01 |
| 84 | OS: Antigen processing and<br>presentation                      | 1 | 91  | 1.10E-02 | 4.58E-01 | 5.89E-01 |
| 85 | OS: T cell receptor signaling<br>pathway                        | 1 | 105 | 9.52E-03 | 5.07E-01 | 6.39E-01 |
| 86 | CP: Oocyte meiosis                                              | 1 | 108 | 9.26E-03 | 5.17E-01 | 6.39E-01 |
| 87 | HD: Amoebiasis                                                  | 1 | 108 | 9.26E-03 | 5.17E-01 | 6.39E-01 |
| 88 | M: Carbon metabolism                                            | 1 | 110 | 9.09E-03 | 5.24E-01 | 6.39E-01 |
| 89 | EIP: HIF-1 signaling pathway                                    | 1 | 111 | 9.01E-03 | 5.27E-01 | 6.39E-01 |
| 90 | OS: Thyroid hormone signaling<br>pathway                        | 1 | 120 | 8.33E-03 | 5.55E-01 | 6.61E-01 |
| 91 | CP: Lysosome                                                    | 1 | 124 | 8.06E-03 | 5.67E-01 | 6.61E-01 |
| 92 | EIP: Neuroactive ligand-receptor<br>interaction                 | 2 | 283 | 7.07E-03 | 5.68E-01 | 6.61E-01 |
| 93 | HD: Hepatitis C                                                 | 1 | 125 | 8.00E-03 | 5.70E-01 | 6.61E-01 |
| 94 | OS: Axon guidance                                               | 1 | 127 | 7.87E-03 | 5.76E-01 | 6.61E-01 |
| 95 | HD: Hepatitis B                                                 | 1 | 136 | 7.35E-03 | 6.01E-01 | 6.79E-01 |
| 96 | OS: Insulin signaling pathway                                   | 1 | 137 | 7.30E-03 | 6.04E-01 | 6.79E-01 |
| 97 | CP: Signaling pathways regulating<br>pluripotency of stem cells | 1 | 140 | 7.14E-03 | 6.12E-01 | 6.80E-01 |
| 98 | HD: MicroRNAs in cancer                                         | 1 | 142 | 7.04E-03 | 6.17E-01 | 6.80E-01 |
| 99 | HD: Pathways in cancer                                          | 2 | 317 | 6.31E-03 | 6.31E-01 | 6.89E-01 |

|     |                                               |   |      |          |          |          |
|-----|-----------------------------------------------|---|------|----------|----------|----------|
| 100 | EIP: Hippo signaling pathway                  | 1 | 154  | 6.49E-03 | 6.47E-01 | 6.97E-01 |
| 101 | HD: Non-alcoholic fatty liver disease (NAFLD) | 1 | 156  | 6.41E-03 | 6.52E-01 | 6.97E-01 |
| 102 | HD: Alzheimer's disease                       | 1 | 179  | 5.59E-03 | 7.03E-01 | 7.44E-01 |
| 103 | EIP: cAMP signaling pathway                   | 1 | 195  | 5.13E-03 | 7.34E-01 | 7.69E-01 |
| 104 | HD: Proteoglycans in cancer                   | 1 | 200  | 5.00E-03 | 7.43E-01 | 7.71E-01 |
| 105 | CP: Focal adhesion                            | 1 | 205  | 4.88E-03 | 7.51E-01 | 7.73E-01 |
| 106 | EIP: Ras signaling pathway                    | 1 | 224  | 4.46E-03 | 7.82E-01 | 7.97E-01 |
| 107 | EIP: PI3K-Akt signaling pathway               | 1 | 330  | 3.03E-03 | 8.96E-01 | 9.04E-01 |
| 108 | M: Metabolic pathways                         | 2 | 1228 | 1.63E-03 | 9.99E-01 | 9.99E-01 |

**Tab.S5b. Enriched KEGG pathways in down regulated genes for frontal cortex (F VS. M)**

| NO. | Term                                             | Input number | Background number | Enrichment Ratio | P-Value  | Corrected P-Value |
|-----|--------------------------------------------------|--------------|-------------------|------------------|----------|-------------------|
| 1   | OS: Toll-like receptor signaling pathway         | 3            | 94                | 3.19E-02         | 1.15E-04 | 3.57E-03          |
| 2   | HD: Rheumatoid arthritis                         | 2            | 83                | 2.41E-02         | 3.52E-03 | 5.45E-02          |
| 3   | EIP: Cell adhesion molecules (CAMs)              | 2            | 166               | 1.20E-02         | 1.35E-02 | 1.17E-01          |
| 4   | OS: Chemokine signaling pathway                  | 2            | 176               | 1.14E-02         | 1.51E-02 | 1.17E-01          |
| 5   | EIP: Cytokine-cytokine receptor interaction      | 2            | 212               | 9.43E-03         | 2.15E-02 | 1.32E-01          |
| 6   | M: alpha-Linolenic acid metabolism               | 1            | 25                | 4.00E-02         | 2.75E-02 | 1.32E-01          |
| 7   | EIP: Neuroactive ligand-receptor interaction     | 2            | 283               | 7.07E-03         | 3.69E-02 | 1.32E-01          |
| 8   | M: Linoleic acid metabolism                      | 1            | 39                | 2.56E-02         | 4.25E-02 | 1.32E-01          |
| 9   | OS: Fat digestion and absorption                 | 1            | 40                | 2.50E-02         | 4.36E-02 | 1.32E-01          |
| 10  | M: Ether lipid metabolism                        | 1            | 42                | 2.38E-02         | 4.58E-02 | 1.32E-01          |
| 11  | OS: Intestinal immune network for IgA production | 1            | 43                | 2.33E-02         | 4.68E-02 | 1.32E-01          |
| 12  | HD: Graft-versus-host disease                    | 1            | 64                | 1.56E-02         | 6.90E-02 | 1.39E-01          |
| 13  | HD: Allograft rejection                          | 1            | 66                | 1.52E-02         | 7.11E-02 | 1.39E-01          |
| 14  | OS: B cell receptor signaling pathway            | 1            | 70                | 1.43E-02         | 7.52E-02 | 1.39E-01          |
| 15  | HD: Autoimmune thyroid disease                   | 1            | 73                | 1.37E-02         | 7.83E-02 | 1.39E-01          |
| 16  | HD: Type I diabetes mellitus                     | 1            | 73                | 1.37E-02         | 7.83E-02 | 1.39E-01          |
| 17  | M: Arachidonic acid metabolism                   | 1            | 77                | 1.30E-02         | 8.25E-02 | 1.39E-01          |
| 18  | OS: Hematopoietic cell lineage                   | 1            | 80                | 1.25E-02         | 8.56E-02 | 1.39E-01          |
| 19  | HD: Salmonella infection                         | 1            | 81                | 1.23E-02         | 8.66E-02 | 1.39E-01          |
| 20  | HD: Viral myocarditis                            | 1            | 86                | 1.16E-02         | 9.17E-02 | 1.39E-01          |
| 21  | M: Glycerophospholipid metabolism                | 1            | 91                | 1.10E-02         | 9.68E-02 | 1.39E-01          |



|    |                                                      |   |      |          |          |          |
|----|------------------------------------------------------|---|------|----------|----------|----------|
| 22 | OS: Pancreatic secretion                             | 1 | 96   | 1.04E-02 | 1.02E-01 | 1.39E-01 |
| 23 | HD: Systemic lupus erythematosus                     | 1 | 97   | 1.03E-02 | 1.03E-01 | 1.39E-01 |
| 24 | HD: Chagas disease                                   | 1 | 104  | 9.62E-03 | 1.10E-01 | 1.42E-01 |
| 25 | OS: Inflammatory mediator regulation of TRP channels | 1 | 112  | 8.93E-03 | 1.18E-01 | 1.46E-01 |
| 26 | OS: Serotonergic synapse                             | 1 | 121  | 8.26E-03 | 1.27E-01 | 1.46E-01 |
| 27 | OS: Vascular smooth muscle contraction               | 1 | 121  | 8.26E-03 | 1.27E-01 | 1.46E-01 |
| 28 | EIP: Calcium signaling pathway                       | 1 | 180  | 5.56E-03 | 1.83E-01 | 2.03E-01 |
| 29 | EIP: cAMP signaling pathway                          | 1 | 195  | 5.13E-03 | 1.97E-01 | 2.11E-01 |
| 30 | EIP: Ras signaling pathway                           | 1 | 224  | 4.46E-03 | 2.24E-01 | 2.31E-01 |
| 31 | M: Metabolic pathways                                | 1 | 1228 | 8.14E-04 | 7.76E-01 | 7.76E-01 |

**Tab.S5c. Enriched KEGG pathways in down regulated genes for frontal cortex (A VS. M)**

| NO. | Term                                        | Input number | Background number | Enrichment Ratio | P-Value  | Corrected P-Value |
|-----|---------------------------------------------|--------------|-------------------|------------------|----------|-------------------|
| 1   | EIP: Cytokine-cytokine receptor interaction | 6            | 212               | 2.83E-02         | 2.28E-05 | 1.62E-03          |
| 2   | OS: Toll-like receptor signaling pathway    | 4            | 94                | 4.26E-02         | 1.38E-04 | 4.89E-03          |
| 3   | OS: Cytosolic DNA-sensing pathway           | 3            | 54                | 5.56E-02         | 4.82E-04 | 1.14E-02          |
| 4   | OS: Complement and coagulation cascades     | 3            | 71                | 4.23E-02         | 1.08E-03 | 1.33E-02          |
| 5   | HD: Pertussis                               | 3            | 72                | 4.17E-02         | 1.12E-03 | 1.33E-02          |
| 6   | OS: Chemokine signaling pathway             | 4            | 176               | 2.27E-02         | 1.49E-03 | 1.33E-02          |
| 7   | OS: Hematopoietic cell lineage              | 3            | 80                | 3.75E-02         | 1.52E-03 | 1.33E-02          |
| 8   | HD: Salmonella infection                    | 3            | 81                | 3.70E-02         | 1.58E-03 | 1.33E-02          |
| 9   | HD: Rheumatoid arthritis                    | 3            | 83                | 3.61E-02         | 1.69E-03 | 1.33E-02          |
| 10  | EIP: NF-kappa B signaling pathway           | 3            | 86                | 3.49E-02         | 1.87E-03 | 1.33E-02          |
| 11  | EIP: TNF signaling pathway                  | 3            | 107               | 2.80E-02         | 3.49E-03 | 2.26E-02          |
| 12  | HD: Staphylococcus aureus infection         | 2            | 49                | 4.08E-02         | 8.78E-03 | 4.98E-02          |
| 13  | HD: Malaria                                 | 2            | 54                | 3.70E-02         | 1.06E-02 | 4.98E-02          |
| 14  | HD: Legionellosis                           | 2            | 55                | 3.64E-02         | 1.10E-02 | 4.98E-02          |
| 15  | HD: Transcriptional misregulation in cancer | 3            | 162               | 1.85E-02         | 1.10E-02 | 4.98E-02          |
| 16  | HD: Influenza A                             | 3            | 163               | 1.84E-02         | 1.12E-02 | 4.98E-02          |
| 17  | HD: Tuberculosis                            | 3            | 169               | 1.78E-02         | 1.24E-02 | 5.17E-02          |
| 18  | M: Butirosin and neomycin biosynthesis      | 1            | 5                 | 2.00E-01         | 1.45E-02 | 5.72E-02          |
| 19  | HD: Leishmaniasis                           | 2            | 66                | 3.03E-02         | 1.55E-02 | 5.81E-02          |
| 20  | CP: Regulation of actin                     | 3            | 216               | 1.39E-02         | 2.38E-02 | 8.44E-02          |

|    | cytoskeleton                                     |   |     |          |          |          |  |
|----|--------------------------------------------------|---|-----|----------|----------|----------|--|
| 21 | EIP: MAPK signaling pathway                      | 3 | 253 | 1.19E-02 | 3.57E-02 | 1.17E-01 |  |
| 22 | HD: Chagas disease                               | 2 | 104 | 1.92E-02 | 3.63E-02 | 1.17E-01 |  |
| 23 | HD: Amoebiasis                                   | 2 | 108 | 1.85E-02 | 3.89E-02 | 1.20E-01 |  |
| 24 | EIP: Cell adhesion molecules (CAMs)              | 2 | 166 | 1.20E-02 | 8.34E-02 | 2.46E-01 |  |
| 25 | M: Galactose metabolism                          | 1 | 31  | 3.23E-02 | 8.68E-02 | 2.46E-01 |  |
| 26 | HD: Prion diseases                               | 1 | 36  | 2.78E-02 | 1.00E-01 | 2.60E-01 |  |
| 27 | CP: Phagosome                                    | 2 | 185 | 1.08E-02 | 1.00E-01 | 2.60E-01 |  |
| 28 | M: Fructose and mannose metabolism               | 1 | 37  | 2.70E-02 | 1.03E-01 | 2.60E-01 |  |
| 29 | OS: Carbohydrate digestion and absorption        | 1 | 41  | 2.44E-02 | 1.13E-01 | 2.69E-01 |  |
| 30 | HD: Herpes simplex infection                     | 2 | 201 | 9.95E-03 | 1.15E-01 | 2.69E-01 |  |
| 31 | OS: Intestinal immune network for IgA production | 1 | 43  | 2.33E-02 | 1.18E-01 | 2.69E-01 |  |
| 32 | EIP: ABC transporters                            | 1 | 46  | 2.17E-02 | 1.26E-01 | 2.69E-01 |  |
| 33 | M: Amino sugar and nucleotide sugar metabolism   | 1 | 47  | 2.13E-02 | 1.29E-01 | 2.69E-01 |  |
| 34 | HD: Epstein-Barr virus infection                 | 2 | 220 | 9.09E-03 | 1.34E-01 | 2.69E-01 |  |
| 35 | HD: Type II diabetes mellitus                    | 1 | 50  | 2.00E-02 | 1.36E-01 | 2.69E-01 |  |
| 36 | M: Starch and sucrose metabolism                 | 1 | 50  | 2.00E-02 | 1.36E-01 | 2.69E-01 |  |
| 37 | OS: NOD-like receptor signaling pathway          | 1 | 56  | 1.79E-02 | 1.51E-01 | 2.84E-01 |  |
| 38 | HD: Acute myeloid leukemia                       | 1 | 57  | 1.75E-02 | 1.54E-01 | 2.84E-01 |  |
| 39 | HD: Inflammatory bowel disease (IBD)             | 1 | 59  | 1.69E-02 | 1.59E-01 | 2.84E-01 |  |
| 40 | EIP: VEGF signaling pathway                      | 1 | 60  | 1.67E-02 | 1.61E-01 | 2.84E-01 |  |
| 41 | OS: RIG-I-like receptor signaling pathway        | 1 | 61  | 1.64E-02 | 1.64E-01 | 2.84E-01 |  |
| 42 | HD: Graft-versus-host disease                    | 1 | 64  | 1.56E-02 | 1.71E-01 | 2.89E-01 |  |
| 43 | M: Glycolysis / Gluconeogenesis                  | 1 | 67  | 1.49E-02 | 1.79E-01 | 2.95E-01 |  |
| 44 | OS: B cell receptor signaling pathway            | 1 | 70  | 1.43E-02 | 1.86E-01 | 2.97E-01 |  |
| 45 | OS: Gastric acid secretion                       | 1 | 72  | 1.39E-02 | 1.91E-01 | 2.97E-01 |  |
| 46 | HD: Type I diabetes mellitus                     | 1 | 73  | 1.37E-02 | 1.93E-01 | 2.97E-01 |  |
| 47 | HD: Chronic myeloid leukemia                     | 1 | 75  | 1.33E-02 | 1.98E-01 | 2.97E-01 |  |
| 48 | HD: HTLV-I infection                             | 2 | 285 | 7.02E-03 | 2.01E-01 | 2.97E-01 |  |
| 49 | CP: Apoptosis                                    | 1 | 81  | 1.23E-02 | 2.12E-01 | 3.07E-01 |  |
| 50 | HD: Viral myocarditis                            | 1 | 86  | 1.16E-02 | 2.23E-01 | 3.17E-01 |  |
| 51 | OS: Natural killer cell mediated cytotoxicity    | 1 | 96  | 1.04E-02 | 2.46E-01 | 3.39E-01 |  |
| 52 | HD: Systemic lupus erythematosus                 | 1 | 97  | 1.03E-02 | 2.48E-01 | 3.39E-01 |  |
| 53 | M: Carbon metabolism                             | 1 | 110 | 9.09E-03 | 2.77E-01 | 3.63E-01 |  |

|    |                                                      |   |      |          |          |          |
|----|------------------------------------------------------|---|------|----------|----------|----------|
| 54 | EIP: HIF-1 signaling pathway                         | 1 | 111  | 9.01E-03 | 2.79E-01 | 3.63E-01 |
| 55 | OS: Inflammatory mediator regulation of TRP channels | 1 | 112  | 8.93E-03 | 2.81E-01 | 3.63E-01 |
| 56 | OS: Leukocyte transendothelial migration             | 1 | 119  | 8.40E-03 | 2.96E-01 | 3.67E-01 |
| 57 | OS: Osteoclast differentiation                       | 1 | 121  | 8.26E-03 | 3.00E-01 | 3.67E-01 |
| 58 | OS: Vascular smooth muscle contraction               | 1 | 121  | 8.26E-03 | 3.00E-01 | 3.67E-01 |
| 59 | HD: Measles                                          | 1 | 130  | 7.69E-03 | 3.18E-01 | 3.79E-01 |
| 60 | OS: Platelet activation                              | 1 | 131  | 7.63E-03 | 3.20E-01 | 3.79E-01 |
| 61 | OS: Insulin signaling pathway                        | 1 | 137  | 7.30E-03 | 3.32E-01 | 3.87E-01 |
| 62 | EIP: Jak-STAT signaling pathway                      | 1 | 141  | 7.09E-03 | 3.40E-01 | 3.90E-01 |
| 63 | HD: Non-alcoholic fatty liver disease (NAFLD)        | 1 | 156  | 6.41E-03 | 3.69E-01 | 4.12E-01 |
| 64 | OS: Oxytocin signaling pathway                       | 1 | 157  | 6.37E-03 | 3.71E-01 | 4.12E-01 |
| 65 | EIP: cGMP-PKG signaling pathway                      | 1 | 168  | 5.95E-03 | 3.91E-01 | 4.28E-01 |
| 66 | EIP: Calcium signaling pathway                       | 1 | 180  | 5.56E-03 | 4.13E-01 | 4.44E-01 |
| 67 | CP: Focal adhesion                                   | 1 | 205  | 4.88E-03 | 4.55E-01 | 4.82E-01 |
| 68 | EIP: Rap1 signaling pathway                          | 1 | 211  | 4.74E-03 | 4.65E-01 | 4.86E-01 |
| 69 | HD: Viral carcinogenesis                             | 1 | 218  | 4.59E-03 | 4.76E-01 | 4.90E-01 |
| 70 | HD: Pathways in cancer                               | 1 | 317  | 3.15E-03 | 6.12E-01 | 6.21E-01 |
| 71 | M: Metabolic pathways                                | 1 | 1228 | 8.14E-04 | 9.80E-01 | 9.80E-01 |
